# Supplementary material for: I-motif sensor for the fluorometric detection of Monkeypox
Source: Royal Society of Chemistry journal article supplement (doi:10.1039/d4an00947a), 2024-01-01
Supplement: d4an00947a1.pdf [file d4an00947a1.pdf]

## Supplementary Information

### **I-motif sensor-based fluorometric detection of Mpox using multiplex-LAMP**

Tasnima Alam Asa,<sup>a</sup> and Young Jun Seo<sup>a,\*</sup>

<sup>a</sup>Department of Chemistry, Jeonbuk National University, Jeonju 54896, South Korea

\*Tel.: +82-63-270-3417; Fax: +82-63-270-3408; E-mail: [tasnima.asa024@gmail.com](mailto:tasnima.asa024@gmail.com), &  
[yseo@jbnu.ac.kr](mailto:yseo@jbnu.ac.kr)

#### **Contents**

1. **Table S1:** Oligonucleotides used in this study.
2. **Supportive data as:**
  - **Figure S1:** The Bar diagram represents the confirmation of pH change over different conditions of the LAMP.
  - **Figure S2:** Confirming i-motif formation by colorimetric change.
  - **Figure S3:** Temperature-dependent multiplex-LAMP gradient study to show LAMP primers suitability
  - **Figure S4:** Fluorescence measurement of multiplex-LAMP mediated i-motif-TO fluorometric assay selectivity study by using nine different bacterial genomes.
  - **Figure S5:** Analysis of amplification plot based on selectivity experiment of Mpox detection by Real-time PCR by using nine different bacterial genomes.
  - **Figure S6:** Fluorescence measurement of multiplex-LAMP mediated i-motif-TO fluorometric assay sensitivity study.
  - **Figure S7:** Analysis of sensitivity experiment of Mpox detection by Real-time PCR through 20% non-denaturing PAGE
  - **Figure S8:** Analysis of sensitivity experiment of multiplex-LAMP mediated i-motif-TO fluorometric detection system with human serum samples to imitate real sample conditions.
  - **Figure S9:** Fluorescence measurement of multiplex-LAMP mediated i-motif-TO fluorometric assay sensitivity study with human serum samples to imitate real sample conditions.

| Target gene                                                                                                                                                                                                                                                                                   | LAMP Primers                                                                                                                                                                                                      |
|-----------------------------------------------------------------------------------------------------------------------------------------------------------------------------------------------------------------------------------------------------------------------------------------------|-------------------------------------------------------------------------------------------------------------------------------------------------------------------------------------------------------------------|
| <b>B6R (204 mers): Envelope protein gene</b><br>cgfttggaagaaaaaatgaaatactcttggaaatgatactgttacgtgtcctaagcggaa<br>tgtcaatcttcaatgtagatcacggatcgtgtcaaccagttaaaggaaaatactcattggg<br>gaacataactatcaactgtgatgttgatagaggattattggcttcgtacataactgtac<br>agctaattcttgg                                 | <b>FIP:</b><br>CGATCCGTGATCTAATTGAAGAGATCTTCTTGGAAATGATACTGTTACG<br><b>BIP:</b> AAGGAAAATACTCATTGGGGAACACGAAGCACCAATAACCTCAT<br><b>F3:</b> CGTTGTGAAGAAAAAATGGAA<br><b>B3:</b> CCAAGAATTAGCTGTACAAGTT             |
| <b>N3R (231 mers): Complement binding protein gene</b><br>gtaagtagtcaatacagggaatagaatattattcatgtgattatacaacaaccgctctac<br>aattaacaacattactttataacggcgaagaatactgaaattgatactgaaaaaagc<br>cactaataaaaacagttgtaattactcaggcttagactacaaaaatggtcgtatagcga<br>agattgtataattatctcagatctttagttagaagaatg | <b>FIP:</b><br>TCAATTTTCAAGTATATTCTTCGCCGTATTTCATGTGATTATACTAACAACCG<br><b>BIP:</b> AACAGTTGGTTAATTACTTCAGGCTAATTATACAATCTTCGCTATCGA<br><b>F3:</b> GTAAGTAGTCAATACGAGGAATT<br><b>B3:</b> CATTCTTCTAATAAAGATCTGAGA |
| <b>E9L (205 mers): DNA polymerase gene</b><br>aaacagtaatcgttaccacttaaacgatataacagtaactgtatgagattgggtaata<br>aatacagaaggaaactcttatcgaagtgacactctatctagaataagtagatcttggg<br>atatcgaatcaggtatttcttagcgaacagttacgtggatcgtcacaatgataacatccat<br>tghtaatcttctg                                      | <b>FIP:</b><br>ACTTCGATAAGAAGTTTCTTCTGTATCGATATAACAGTAACCTGTATGC<br><b>BIP:</b> AAGTACGATCTTGGGATATCGAATCTGTGACGATCCACGTAAC<br><b>F3:</b> AAACAGTAATCGTTTACCCTT<br><b>B3:</b> GACAAAAGATTAACAATGGATGTT            |
| Target gene                                                                                                                                                                                                                                                                                   | RT-qPCR Primers                                                                                                                                                                                                   |
| <b>B6R (92 mers): Envelope protein gene</b><br>cggatcgtgtcaaccagttaaaggaaaatactcattggggaacataataactcaactgtg<br>atgttgatagaggattattgtgcttcgt                                                                                                                                                   | <b>Forward:</b> CGGATCGTGTCAACCAGTTA<br><b>Reverse:</b> ACGAAGCACCAATAACCTCATA                                                                                                                                    |
| <b>N3R (116 mers): Complement binding protein gene</b><br>actaacaaccgctcacaattaacaacattctttataacggcgaagaatatactgaaatt<br>gatagatcgaaaaagccactaataaaaacagttgtaattactcaggctt                                                                                                                    | <b>Forward:</b> ACTAACAACCGTCTACAATTAAC<br><b>Reverse:</b> AAGCTGAAGTAATTAACCAACTG                                                                                                                                |
| <b>E9L (141 mers): DNA polymerase gene</b><br>actgtatgagattgggtaataatacagaaggaaactcttatcgaagtgacactctat<br>atctagaataagtagatcttggatcgaatcaggtatttcttagcgaacagttacgt<br>ggatcgtcacaatg                                                                                                         | <b>Forward:</b> ACTTGTATGCGAGATTGGGTTAATA<br><b>Reverse:</b> CATTGTGACGATCCACGTAAC                                                                                                                                |
| <b>I-motif sequences (red colored one "Rb" mainly used in our detection system)</b>                                                                                                                                                                                                           |                                                                                                                                                                                                                   |
| <input type="checkbox"/> <b>H-telo:</b> TAACCCTAACCCCTAACCCCTAACCC<br><input checked="" type="checkbox"/> <b>Rb:</b> CCGCCCAAAACCCCC<br><input type="checkbox"/> <b>HIF-1<math>\alpha</math>:</b> CCCGCCCTCTCCCA<br><input type="checkbox"/> <b>c-MYC:</b> CCCACCTTCCCCACCCCTCCCCACCCCTCCCC   |                                                                                                                                                                                                                   |

**Table S1: Oligonucleotides used in this study.**

## 1. Supportive data:

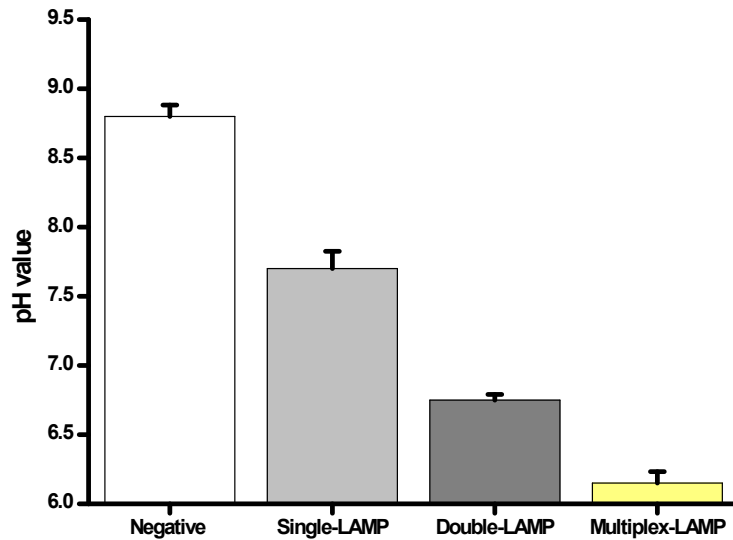

**Figure S1:** The Bar diagram represents the confirmation of pH change over different conditions of the LAMP (single, double, and multiplex) reaction. Data was measured from 5 replicates of each reaction; where error bars represent the standard deviations of five replicates.

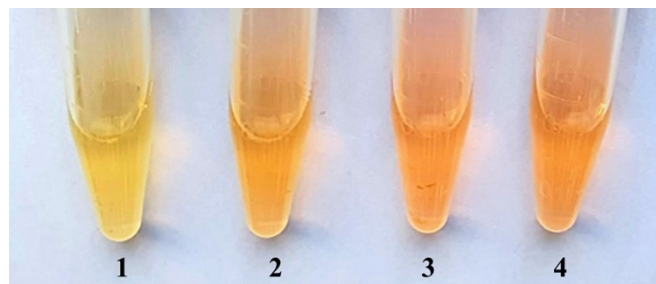

**Figure S2:** Confirming i-motif formation by the TO color change, whereas, after post-LAMP amplification, TO was added. Here, Lane 1: Multiplex LAMP without any target (negative control), Lane 2: Single-LAMP, Lane 3: Double-LAMP, Lane 4: Multiplex-LAMP (positive control). In Figure S2, we can clearly see the color difference between the negative and positive controls of multiplex-LAMP (lane 1 & lane 4). Additionally, from left to right (conversion from light yellow to dense yellow), while the color intensity difference is not significantly recognizable, still upon careful observation; even to the naked eye, the slight variations are more apparent.

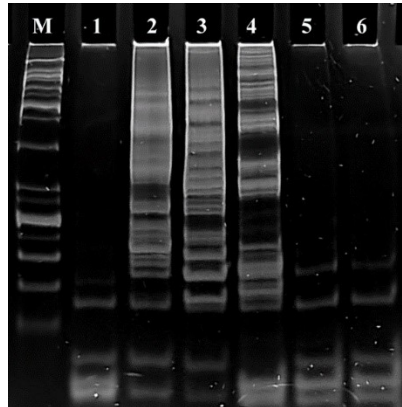

**Figure S3:** Temperature-dependent multiplex-LAMP gradient study to show LAMP primers suitability by 20% non-denaturing PAGE. Lane M: 25/100 bp DNA marker, Lane 1: at 65°C negative control, Lane 2: at 65°C positive control, Lane 3: at 60°C positive control, Lane 4: at 55°C positive control, Lane 5: at 60°C negative control, Lane 6: at 55°C negative control.

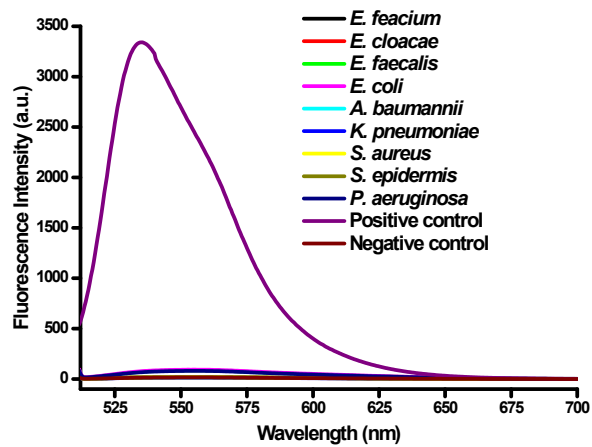

**Figure S4:** Fluorescence measurement of multiplex-LAMP mediated i-motif-TO fluorometric assay selectivity study by using nine different bacterial genomes; including negative and positive control of our system. All fluorescence emission peaks were measured at 535 nm (Thiazole Orange; TO) wavelength.

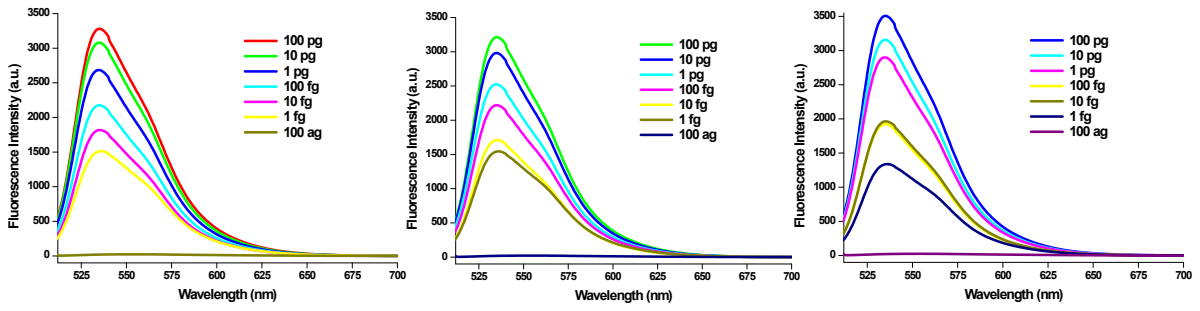

**Figure S5:** Fluorescence measurement of multiplex-LAMP mediated i-motif-TO fluorometric assay sensitivity study. A, B, and C represent the three-replication study of sensitivity experiments. All fluorescence emission peaks were measured at 535 nm (Thiazole Orange; TO) wavelength.

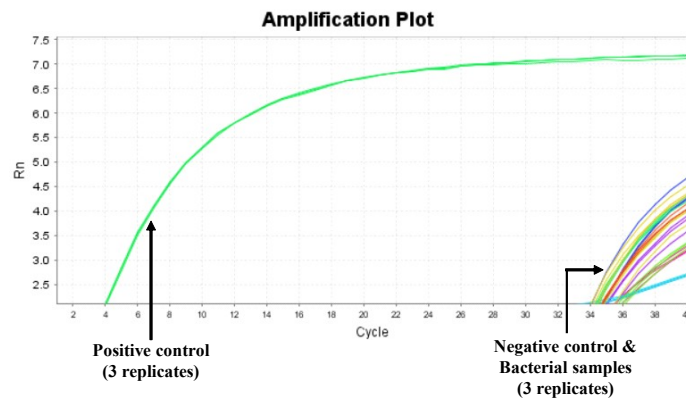

**Figure S6:** Analysis of amplification plot based on selectivity experiment of Mpox detection by Real-time PCR by using nine different bacterial genomes.

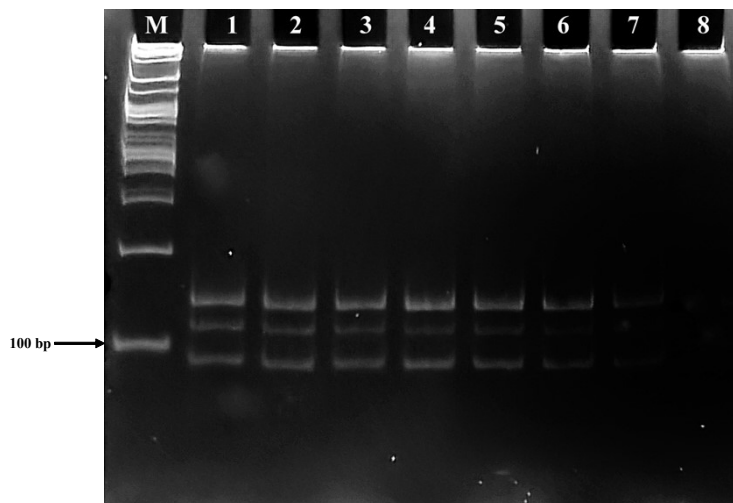

**Figure S7:** Analysis of sensitivity experiment of Mpx detection by Real-time PCR through 20% non-denaturing PAGE; where B6R gene (92 mers), N3R (116 mers), and E9L (141 mers). Here, Lane M: 100 bp DNA marker, Lane 1: 100 pg, Lane 2: 10 pg, Lane 3: 1 pg, Lane 4: 100 fg, Lane 5: 10 fg, Lane 6: 1 fg, Lane 7: 100 ag, Lane 8: negative control (without any target).

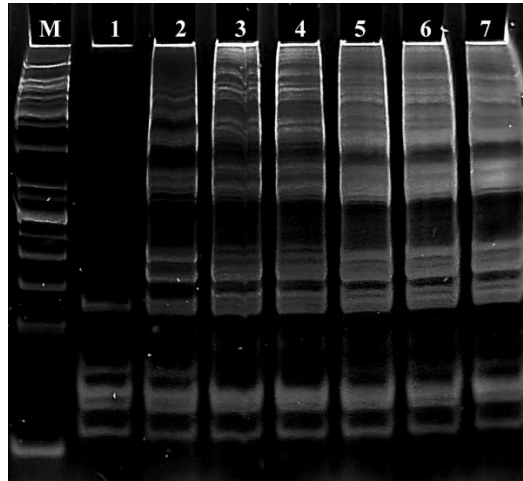

**Figure S8:** Analysis of sensitivity experiment of multiplex-LAMP mediated i-motif-TO fluorometric detection system with human serum samples to imitate real sample conditions by 20% non-denaturing PAGE. Here, Lane M: 25/100 bp DNA marker, Lane 1: 100 ag, Lane 2: 1 fg, Lane 3: 10 fg, Lane 4: 100 fg, Lane 5: 1 pg, Lane 6: 10 pg, Lane 7: 100 pg.

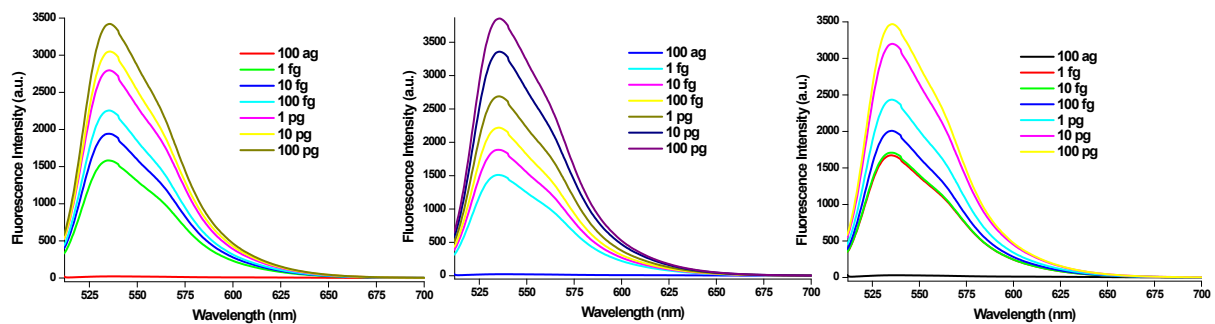

**Figure S9:** Fluorescence measurement of multiplex-LAMP mediated i-motif-TO fluorometric assay sensitivity study with human serum samples to imitate real sample conditions. A, B, and C represent the three-replication study of sensitivity experiments. All fluorescence emission peaks were measured at 535 nm (Thiazole Orange; TO) wavelength.
